# Supplementary material for: Nitrogen-doped mesoporous carbon supported CuSb for electroreduction of CO2
Source: Royal Society of Chemistry journal article supplement (doi:10.1039/d2ra01893d), 2022-01-01
Supplement: d2ra01893d1.pdf [file d2ra01893d1.pdf]

Supporting Information for

**Nitrogen-doped mesoporous carbon supported CuSb for  
electroreduction of CO<sub>2</sub>**

Yue Hou,<sup>[a]</sup> Cheng-Jie Jiang,<sup>[a]</sup> Ying Wang,<sup>[a]</sup> Jing-Wei Zhu,<sup>[a]</sup> Jia-Xing Lu,\*<sup>[a,b]</sup> and  
Huan Wang\*<sup>[a,b]</sup>

[a] Shanghai Key Laboratory of Green Chemistry and Chemical Processes, School of  
Chemistry and Molecular Engineering, East China Normal University, Shanghai  
200062, P. R. China

[b] Institute of Eco-Chongming, Shanghai 202162, China

[\*] Corresponding author.

Tel: 86 21 62233491. E-mail: jxlu@chem.ecnu.edu.cn (Jia-Xing Lu)

Tel: 86 21 52134935. E-mail: hwang@chem.ecnu.edu.cn (Huan Wang)

## Supplementary Figures:

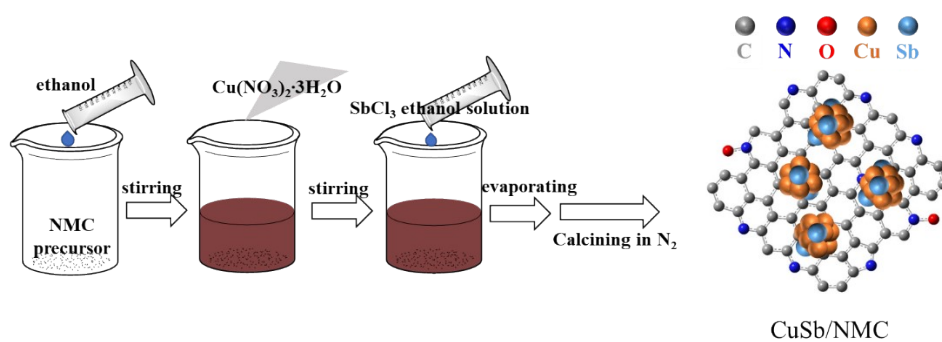

**Fig. S1** Synthesis procedure of CuSb/NMC.

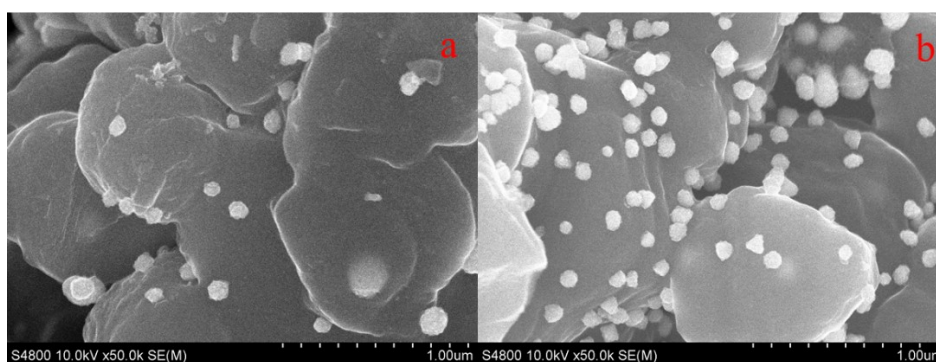

**Fig. S2** SEM characterization results of materials (a) CuSb/NMC-1 and (b) CuSb/NMC-3.

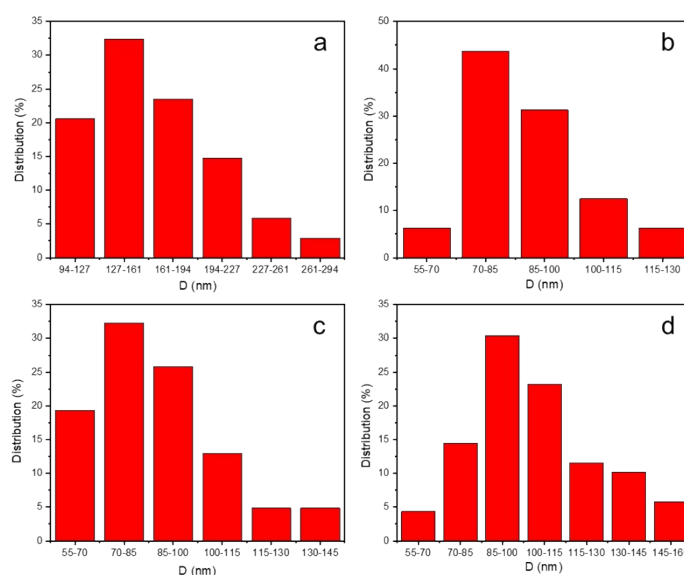

**Fig. S3** Particle diameter distribution histograms of materials

(a) Cu/NMC, (b) CuSb/NMC-1, (c) CuSb/NMC-2 and (d) CuSb/NMC-3.

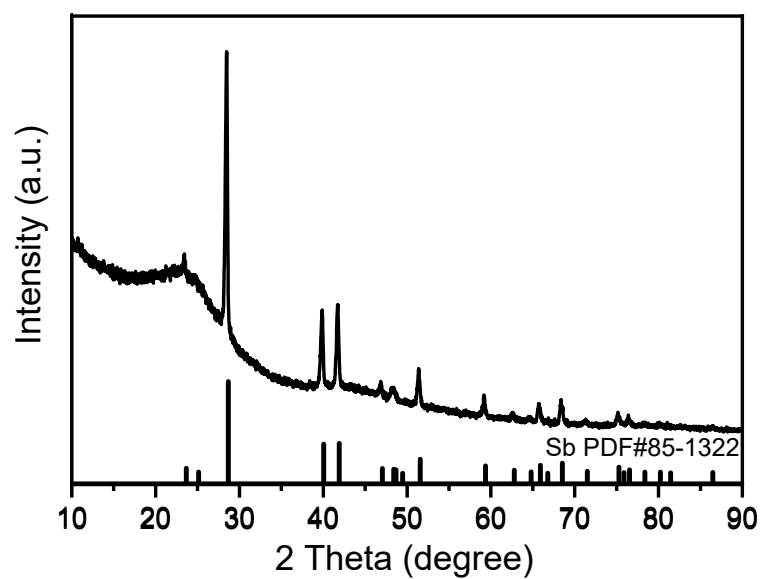

**Fig. S4** XRD diffraction pattern of Sb/NMC-2 (dosage is 10 times that of Sb/NMC).

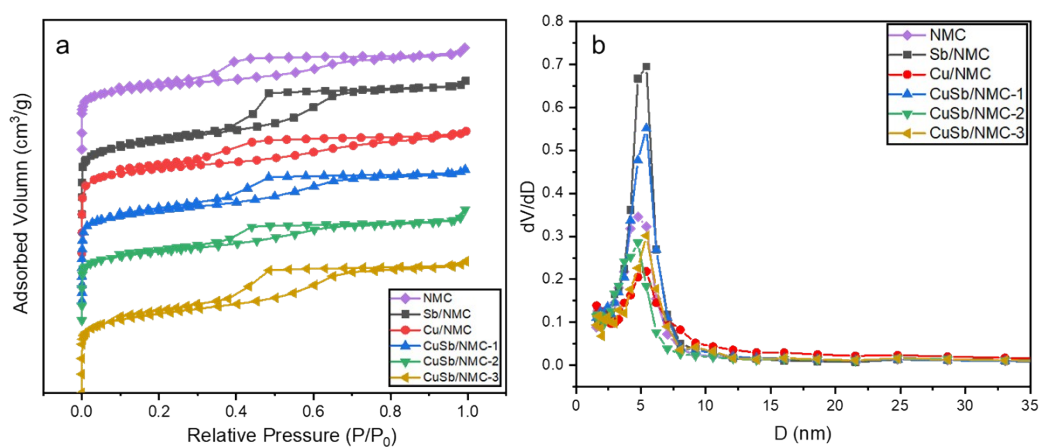

**Fig. S5** Nitrogen adsorption and desorption isotherms (a) and pore size distribution plots (b) of NMC and composites.

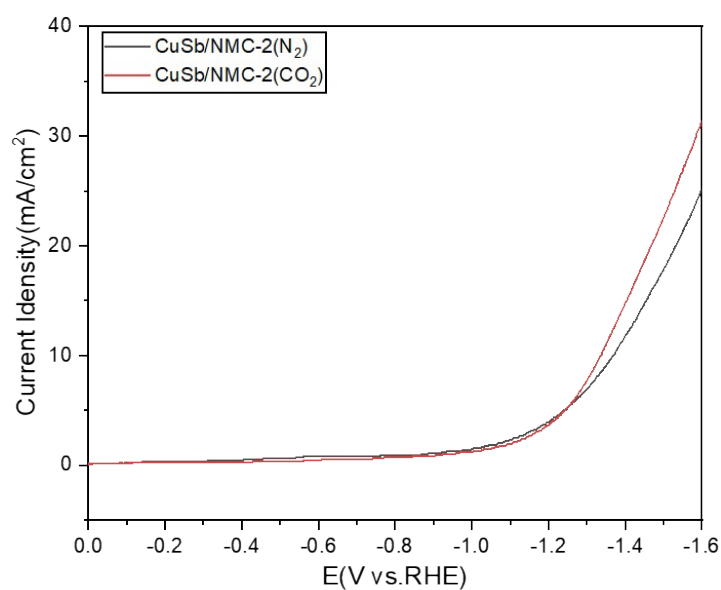

**Fig. S6** LSV curves of CuSb/NMC-2 on glassy carbon electrode under saturated  $\text{CO}_2$  and  $\text{N}_2$

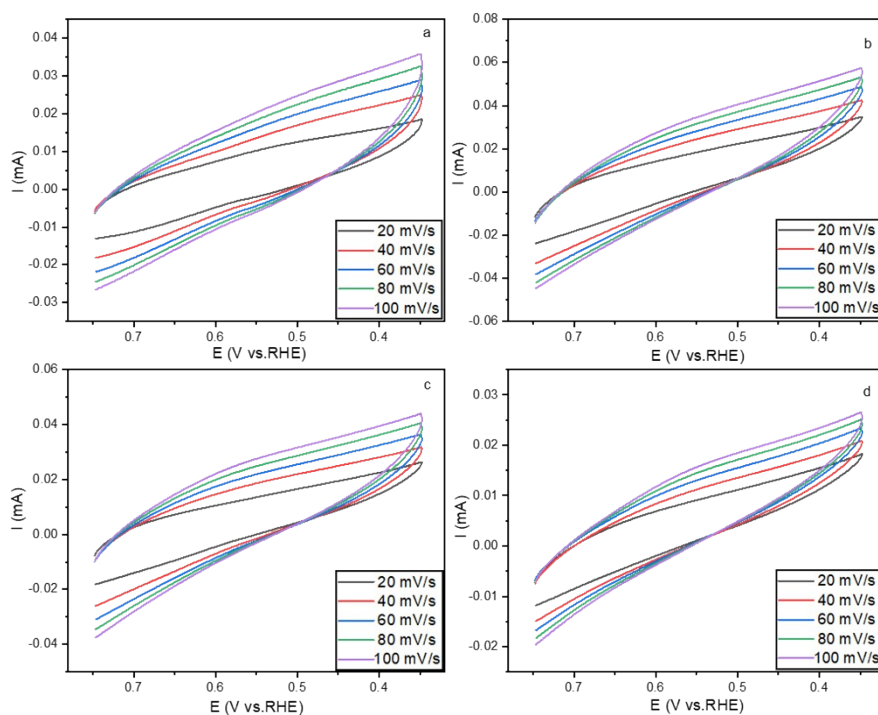

**Fig. S7** Cyclic voltammograms of CuSb/NMC composite materials and Cu/NMC in 0.1 M  $\text{KHCO}_3$  solution saturated with  $\text{N}_2$  (a) Cu/NMC, (b) CuSb/NMC-1, (c) CuSb/NMC-2 and (d) CuSb/NMC-3.

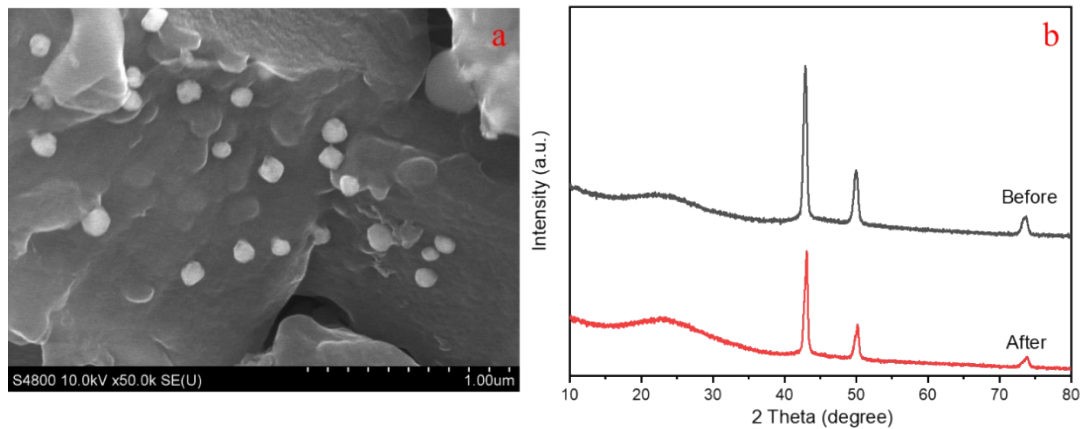

**Fig. S8** (a) SEM image of CuSb/NMC-2 after 10000 s reaction, and (b) XRD pattern of CuSb/NMC-2 before and after 10000 s reaction.
